# Supplementary material
Source: Research Square preprint supplement (doi:10.21203/rs.3.rs-10091796/v1)
Supplement: Supplementary file 1 [file 12627e39ab42e288fa718cf0.xlsx]

## Sheet: Average forest composition
	Coniferous, even-aged	Coniferous, uneven-aged	Deciduous, even-aged	Deciduous, uneven-aged	Deciduous and coniferous, uneven-aged	Forests without intervention
	0.328485	0.167174	0.103182	0.0440363	0.250854	0.106268

## Sheet: Procedure
Survey	National forest inventory				%
Forest type	Forest type	Subcategory	Share	1000 ha			First, we transferred estimates provided for the small-scale forestry for the coniferous, deciduous and mixed stands to the corresponding generic stand types with uneven age structures (BFW, 2022). For the forest without intervention, we attributed protective forest out of yield, as the only available data on the forest area without regular management. Second, we estimated a share of the SPFO of …
Coniferous, even-aged	Even-aged forest	Spruce	1	589.634	0.328485
		Fir	1	8.63142
		Larch	1	16.7234
		Pine	1	46.9334
		Swiss stone pine	1	0.539464
		Other coniferous	1	2.15786
	Glade		1/6	6.20383
	Gaps		1/6	21.5786
Coniferous, uneven-aged	Monoculture	Softwood (proportion > 8/10)	"Softwood" - "Even-aged forest" in coniferous, even-aged	311.381	0.167174
	Glade		1/6	6.20383
	Gaps		1/6	21.5786
	Shrubs		1/4	9.84521
	Shrub areas		1/4	3.37165
Deciduous, even-aged	Even-aged forest	Beech forests	1	81.9985	0.103182
		Oak forests	1	10.7893
		Other hard-leaved	1	52.8675
		Other soft-leaved	1	31.2889
	Sprouting forest		1/3	12.7673
	Glade		1/6	6.20383
	Gaps		1/6	21.5786
Deciduous, uneven-aged	Monoculture	Hardwood (proportion > 8/10)	"Hardwood" - "Even-aged forest" in deciduous, even-aged	39.0559	0.0440363
	Sprouting forest		1/3	12.7673
	Glade		1/6	6.20383
	Gaps		1/6	21.5786
	Shrubs		1/4	9.84521
	Shrub areas		1/4	3.37165
Deciduous and coniferous, uneven-aged	Mixed forest		1	475	0.250854
	Sprouting forest		1/3	12.7673
	Glade		1/6	6.20383
	Gaps		1/6	21.5786
	Shrubs		1/4	9.84521
	Shrub areas		1/4	3.37165
Forests without intervention	Protective forest out of yield		1	183	0.106268
	Glade		1/6	6.20383
	Gaps		1/6	21.5786
	Shrubs		1/4	9.84521
	Shrub areas		1/4	3.37165
				2107.86	1

## Sheet: Small-scale forestry share
Period: 2007-09	Total forest area		Private small-scale forestry (≦ 200 ha)
	1000 ha	±	1000 ha	±	Share relative to the total forest area
Forest area with regular management	3367	44	1917	37				Estimate
Protective forest out of yield	484	18	183
Woodland out of yield	140	6	53
Total	3991	46	2153	39	0.539464
Source: BFW. (2022). Austrian National Forest Inventory. https://www.waldinventur.at/#/

## Sheet: Mixed forest area
Period: 2007-09	Total forest area		Private small-scale forestry (≦ 200 ha)
	1000 ha	±	1000 ha	±			Estimate
Monoculture
Coniferous (proportion > 8/10)	1724	33	976	26
Deciduous (proportion > 8/10)	383	14	216	10
Mixed forest	782		475
Coniferous (proportion 6/10- 8/10)	456	14	277	11
Deciduous (proportion 5/10- 8/10)	326	12	198	9
Total	2889	40	1667	33
Uncategorized forest areas
Sprouting forest	71	8	38.3019
Glade	69	5	37.223
Gaps	240	7	129.471
Shrubs	73	3	39.3809
Shrub areas	25	3	13.4866
Forest area with regular management	3367	44
Source: BFW. (2022). Austrian National Forest Inventory. https://www.waldinventur.at/#/

## Sheet: Even-aged forest
	Total forest area	Private small-scale forestry (≦ 200 ha)
Forest type by species	1000 ha	1000 ha			Estimate
Spruce	1093	589.634
Fir	16	8.63142
Larch	31	16.7234
Pine	87	46.9334
Swiss stone pine	1	0.539464
Other coniferous	4	2.15786
Beech forests	152	81.9985
Oak forests	20	10.7893
Other hard-leaved	98	52.8675
Other soft-leaved	58	31.2889
Total	1562	842.642
Source: Prskawetz, M., & Gschwantner, T. (2011). Altersklassenwälder in Österreich – in ihrer Verbreitung oft überschätzt. Forstzeitung, 11, 44–46.

## Sheet: Sources
BFW. (2022). Austrian National Forest Inventory. https://www.waldinventur.at
Prskawetz, M., & Gschwantner, T. (2011). Altersklassenwälder in Österreich – in ihrer Verbreitung oft überschätzt. Forstzeitung, 11, 44–46.
